# Supplementary material
Source: publisher figshare collection journal article supplement (https://acs.figshare.com/ndownloader/files/5199106)
Supplement: Supplementary file 1 [file 5199106]

## Supporting Information for

### Chirality-Organized Ferrocene Receptor Bearing Podand Dipeptide Chains (-L-Ala-L-Pro-NHPyMe) for the Selective Recognition of Dicarboxylic Acids

Toshiyuki Moriuchi, Kazuhiro Yoshida, and Toshikazu Hirao\*

*Department of Materials Chemistry, Graduate School of Engineering, Osaka University,  
Yamada-oka, Suita, Osaka 565-0871, Japan*

*hirao@chem.eng.osaka-u.ac.jp*

#### General Comments

All reagents and solvents were purchased from commercial sources and were further purified by the standard methods, if necessary. Melting points were determined on a Yanagimoto Micromelting Point Apparatus and were uncorrected. Infrared spectra were obtained with a Perkin Elmer Model 1605 FT-IR. <sup>1</sup>H NMR spectra were recorded on a Varian MERCURY 300 (300 MHz) spectrometer with tetramethylsilane as an internal standard. Mass spectra were run on a JEOL JMS-DX303HF mass spectrometer.

#### Preparation of the ferrocene 1 bearing podand dipeptide chains (-L-Ala-L-Pro-NHPyMe).

To a stirred mixture of H-L-Ala-L-Pro-NHPyMe (138.2 mg, 0.50 mmol) and triethylamine (348  $\mu$ L, 2.5 mmol) in CH<sub>2</sub>Cl<sub>2</sub> (5 mL) was dropwise added 1,1'-bis(chlorocarbonyl)ferrocene (77.7 mg, 0.25 mmol) in CH<sub>2</sub>Cl<sub>2</sub> (5 mL) under argon at 0 °C. The

mixture was stirred at 0 °C for 1 h and then at room temperature for 4 h. The resulting mixture was diluted with CH<sub>2</sub>Cl<sub>2</sub>, washed with saturated NaHCO<sub>3</sub> aqueous solution and brine, and then dried over Na<sub>2</sub>SO<sub>4</sub>. The solvent was evaporated in vacuo. Purification was performed by a recycling preparative HPLC (Japan Analytical Industry Co. Ltd., Model LC-908), equipped with JAIGEL-1H and -2H columns (GPC, CHCl<sub>3</sub> as an eluent). The ferrocene **1** was isolated in 70% yield by recrystallization from CHCl<sub>3</sub>. Mp 148-150 °C (uncorrected); IR (CH<sub>2</sub>Cl<sub>2</sub>, 1.0 x 10<sup>-3</sup> M): 3399, 3307, 1697, 1634 cm<sup>-1</sup>; <sup>1</sup>H NMR (300 MHz, CDCl<sub>3</sub>, 5.0 x 10<sup>-3</sup> M): δ 8.84 (d, 2H, *J* = 7.2 Hz), 8.78 (s, 2H), 7.91 (d, 2H, *J* = 8.4 Hz), 7.55 (dd, 2H, *J* = 8.4, 7.5 Hz), 6.87 (d, 2H, *J* = 7.5 Hz), 4.90-4.88 (m, 4H), 4.86-4.74 (m, 4H), 4.54-4.52 (m, 2H), 4.31-4.29 (m, 2H), 3.99-3.91 (m, 2H), 3.71-3.66 (m, 2H), 2.45-2.11 (m, 14H), 1.33 (d, 6H, *J* = 7.2 Hz); FAB-MS *m/z* 791 (M<sup>+</sup>+1); Anal. Calcd for C<sub>40</sub>H<sub>46</sub>N<sub>8</sub>O<sub>6</sub>Fe•H<sub>2</sub>O: C, 59.41; H, 5.98; N, 13.86. Found: C, 59.07; H, 5.64; N, 13.47.

#### **Preparation of the ferrocene **2** bearing one dipeptide chain (-L-Ala-L-Pro-NHPyMe).**

To a stirred solution of H-L-Ala-L-Pro-NHPyMe (65.6 mg, 0.25 mmol) and triethylamine (139 μL, 1.0 mmol) in CH<sub>2</sub>Cl<sub>2</sub> (5 mL) was dropwise added (chlorocarbonyl)ferrocene (62.1 mg, 0.25 mmol) in CH<sub>2</sub>Cl<sub>2</sub> (5 mL) under argon at 0 °C. The mixture was stirred at 0 °C for 1 h and then at room temperature for 4 h. The resulting mixture was diluted with CH<sub>2</sub>Cl<sub>2</sub>, washed with saturated NaHCO<sub>3</sub> aqueous solution and brine, and then dried over Na<sub>2</sub>SO<sub>4</sub>. The solvent was evaporated in vacuo. Purification was performed by a recycling preparative HPLC (Japan Analytical Industry Co. Ltd., Model LC-908), equipped with JAIGEL-1H and -2H columns (GPC, using CHCl<sub>3</sub> as an eluent). The ferrocene **2** was isolated in 54% yield by recrystallization from CHCl<sub>3</sub>. Mp 95-97 °C (uncorrected); IR (CH<sub>2</sub>Cl<sub>2</sub>, 2.0 x 10<sup>-3</sup> M): 3411, 1701, 1636 cm<sup>-1</sup>; <sup>1</sup>H NMR (300 MHz, CDCl<sub>3</sub>, 1.0 x 10<sup>-2</sup> M): δ 8.86 (s, 1H), 7.96 (d, 1H, *J* = 8.1 Hz), 7.57 (dd, 1H, *J* = 8.1,

7.2 Hz), 6.89 (d, 1H,  $J = 7.2$  Hz), 6.69 (d, 1H,  $J = 7.5$  Hz), 4.99-4.90 (m, 1H), 4.74-4.69 (m, 3H), 4.35-4.34 (m, 2H), 4.22 (s, 5H), 3.87-3.79 (m, 1H), 3.74-3.67 (m, 1H), 2.45 (s, 3H), 2.38-2.32 (m, 1H), 2.24-2.06 (m, 3H), 1.50 (d, 3H,  $J = 6.6$  Hz); FAB-MS  $m/z$  489 ( $M^+ + 1$ ); Anal. Calcd for  $C_{25}H_{28}N_4O_3Fe \cdot H_2O$ : C, 59.30; H, 5.97; N, 11.06. Found: C, 58.93; H, 6.08; N, 10.67.

### CD Measurements.

CD spectra were recorded using a JASCO J-720 spectropolarimeter in the deaerated  $CH_3CN$  solution with the concentration ( $1.0 \times 10^{-4}$  M) under argon at 25 °C.

### Determination of Stoichiometry and Association Constants.

In seven separate 5-mm-o.d. NMR tubes **1** and **3c** were mixed changing ratio from 0 to 1 while maintaining a total concentration  $5.0 \times 10^{-3}$  M ( $CDCl_3/acetone-d_6$  (5/1)) under argon at 25 °C. The chemical shift of *NH* adjacent to the pyridyl moiety of **1** was recorded for each sample. The stoichiometry of receptor-guest complex formation was determined by using Job plots. Job plots for the complexation of **1** and **3c** was shown in Figure S2. The association constants were calculated by fitting the data to a 1:1 binding isotherm using the program, kindly provided by Dr. K. Hirose at Osaka University (Naemura, K.; Fuji, J.; Ogasahara, K.; Hirose, K.; Tobe, Y. *Chem. Commun.* **1996**, 2749; Naemura, K.; Nishikawa, Y.; Fuji, J.; Hirose, K.; Tobe, Y. *Tetrahedron: Asymmetry* **1997**, 8, 873.).

### X-ray Structure Analysis.

All measurements for **1** were made on a Rigaku RAXIS-RAPID Imaging Plate diffractometer with graphite monochromated Mo  $K\alpha$  radiation. The structure of **1** was solved by direct methods and expanded using Fourier techniques. The non-hydrogen atoms were refined anisotropically. The H atoms involved in hydrogen bonding were located in electron density maps. The remainder of the H atoms were placed in idealized positions and allowed to ride with the C

atoms to which each was bonded. Crystallographic details are given in Table S1.
